# Supplementary material for: Spectroscopic, computational, and biological activity studies of bivalent metal complexes of ( E )- N ′-(4-(dimethylamino)benzylidene) isonicotinohydrazide
Source: Royal Society of Chemistry journal article supplement (doi:10.1039/d5ra07625k), 2026-01-01
Supplement: d5ra07625k1.pdf [file d5ra07625k1.pdf]

## **Spectroscopic, computational, and biological activity studies of bivalent metal complexes of (*E*)-N'-(4-(dimethylamino)benzylidene)isonicotinohydrazide**

Osama'a A. Y. Al-Samrai<sup>1</sup>, Mohamed E Eissa<sup>2</sup>, Khalid Tuama Abdullah<sup>3</sup>, Tarek A. Yousef<sup>2\*</sup>, Mona H Alhalafi<sup>4</sup>, Ahmed S. M. Al-Janabi<sup>5\*</sup>,

<sup>1</sup>*Department of Chemistry, College of Education for Pure Sciences, University of Samarra, Samarra, Iraq*

<sup>2</sup>*College of Science, Chemistry Department, Imam Mohammad Ibn Saud Islamic University (IMSIU), Riyadh 11623, Saudi Arabia*

<sup>3</sup>*Department of Chemistry, College of Education for Pure Science, University of Diyala, Diyala, Iraq*

<sup>4</sup>*Department of Chemistry, College of Science Al-Zulfi, Majmaah University, Al-Majmaah 11952, Saudi Arabia*

<sup>5</sup>*Department of Chemistry, College of Science, Tikrit University, Tikrit, Iraq*

**Fig. SI 1.** Theoretical and Experimental FT-IR spectra of the **HL Ligand** calculated at the B3LYP/6-31G+(d,p) level with frequency scaling using CCCBDB factors **0.964**.

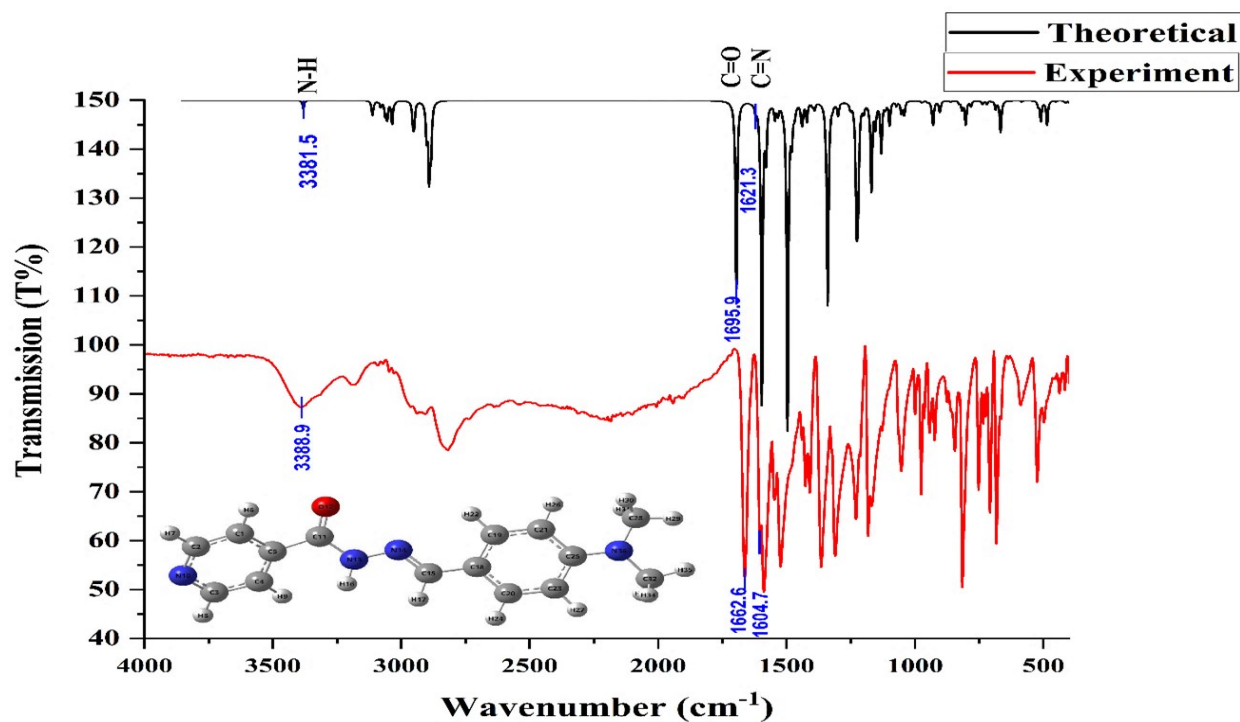

**Fig. SI 2.** Theoretical and Experimental FT-IR spectra of the **complex (1)** calculated at the B3LYP/6-31G+(d,p) level with frequency scaling using CCCBDB factors **0.964**.

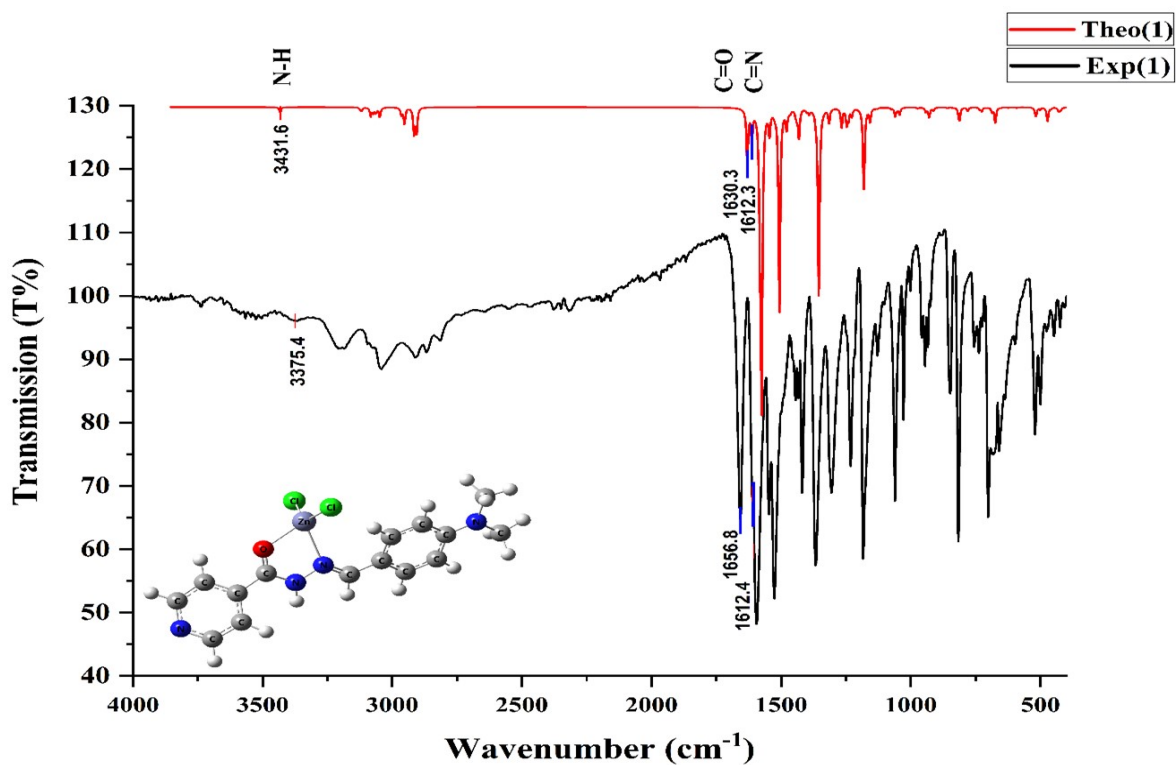

**Fig. SI 3.** Theoretical and Experimental FT-IR spectra of the **complex (3)** calculated at the B3LYP/6-31G+(d,p) level with frequency scaling using CCCBDB factors **0.964**.

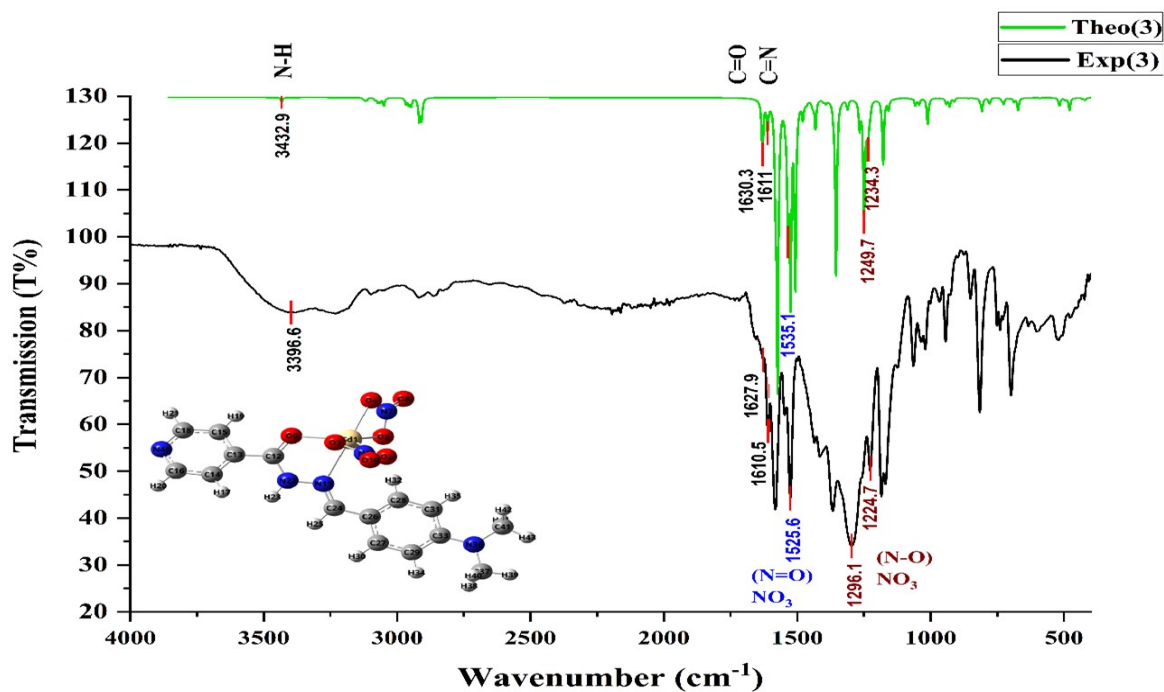

**Fig. SI 4.** Theoretical and Experimental FT-IR spectra of the **complex (4)** calculated at the B3LYP/6-31G+(d,p) level with frequency scaling using CCCBDB factors **0.964**.

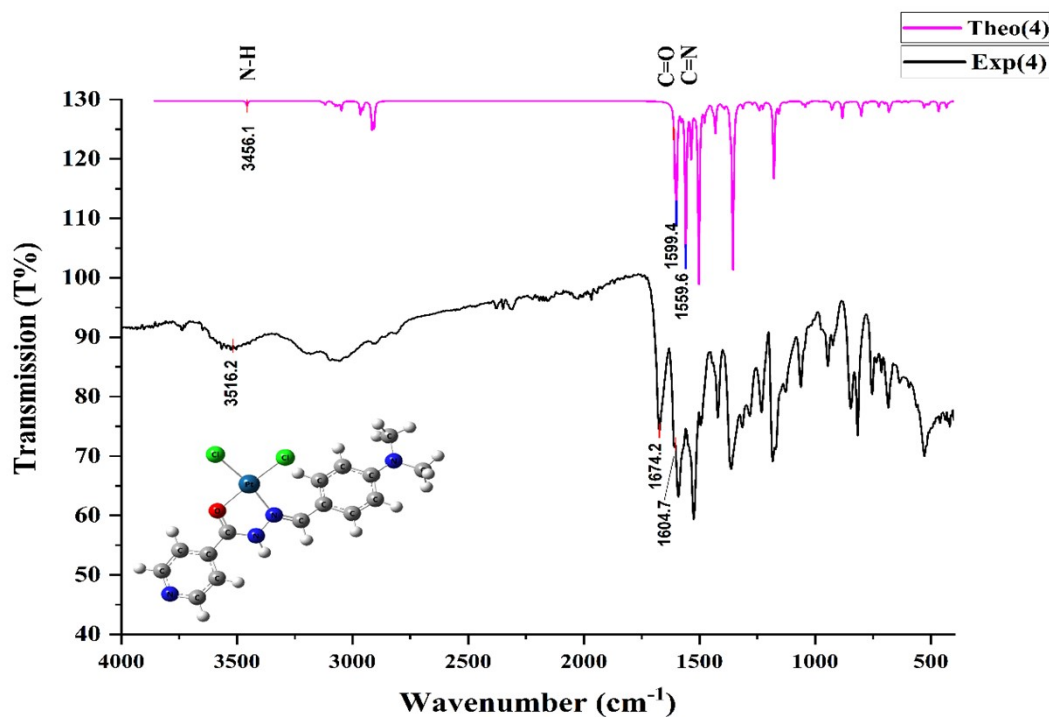

**Fig. SI 5.**  $^1\text{H}$  NMR spectrum of the **HL Ligand**

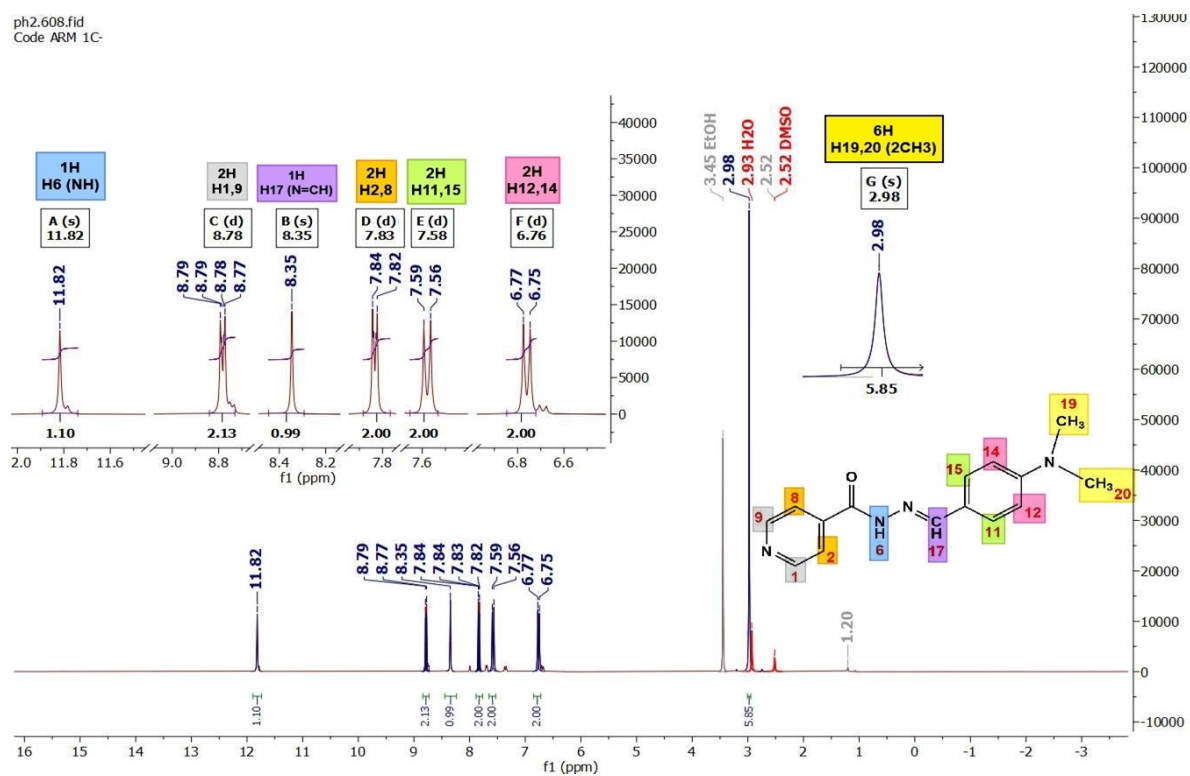

**Fig. SI 6.**  $^1\text{H}$  NMR spectrum of the **complex (1)**

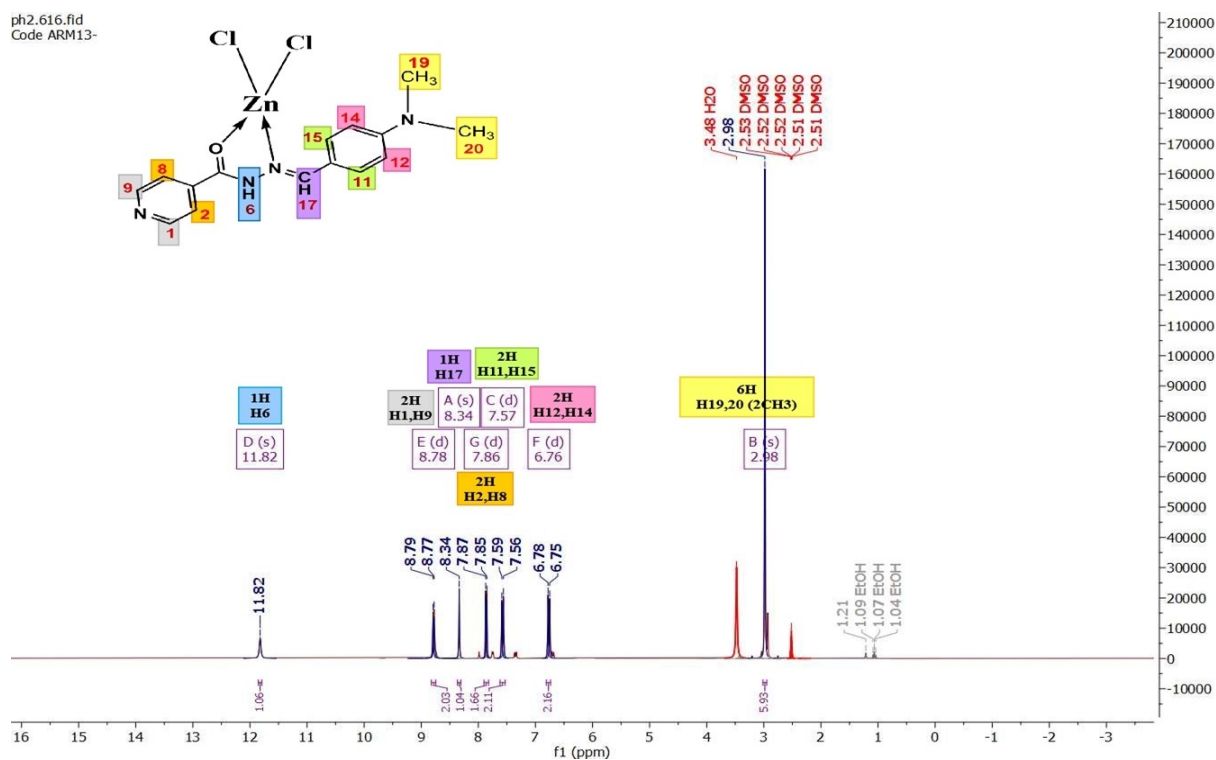

**Fig. SI 7.**  $^1\text{H}$  NMR spectrum of the **complex (2)**

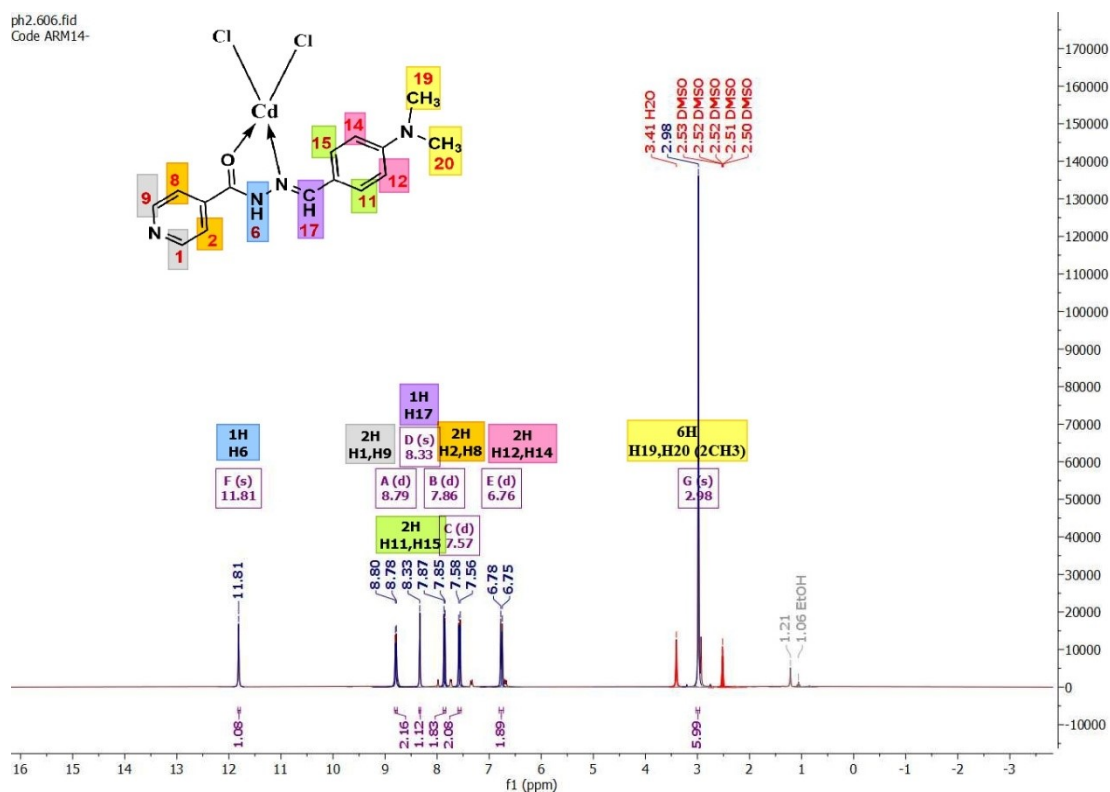

**Fig. SI 8.**  $^1\text{H}$  NMR spectrum of the **complex (3)**

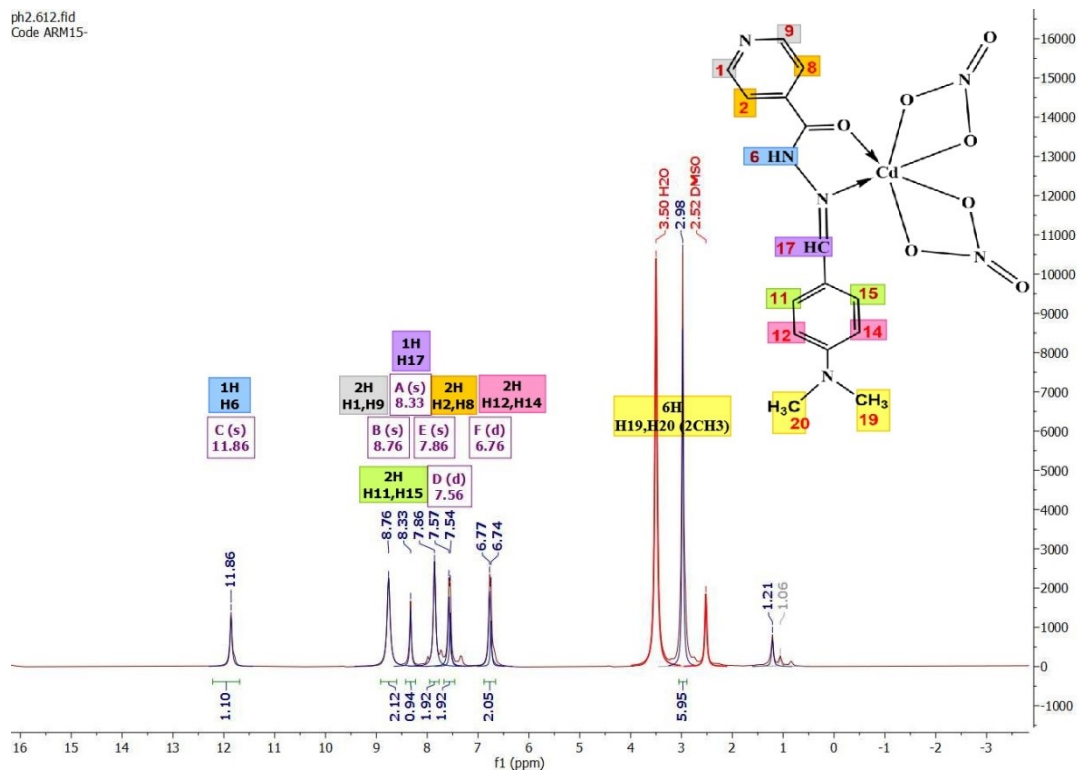

**Fig. SI 9.**  $^1\text{H}$  NMR spectrum of the **complex (4)**

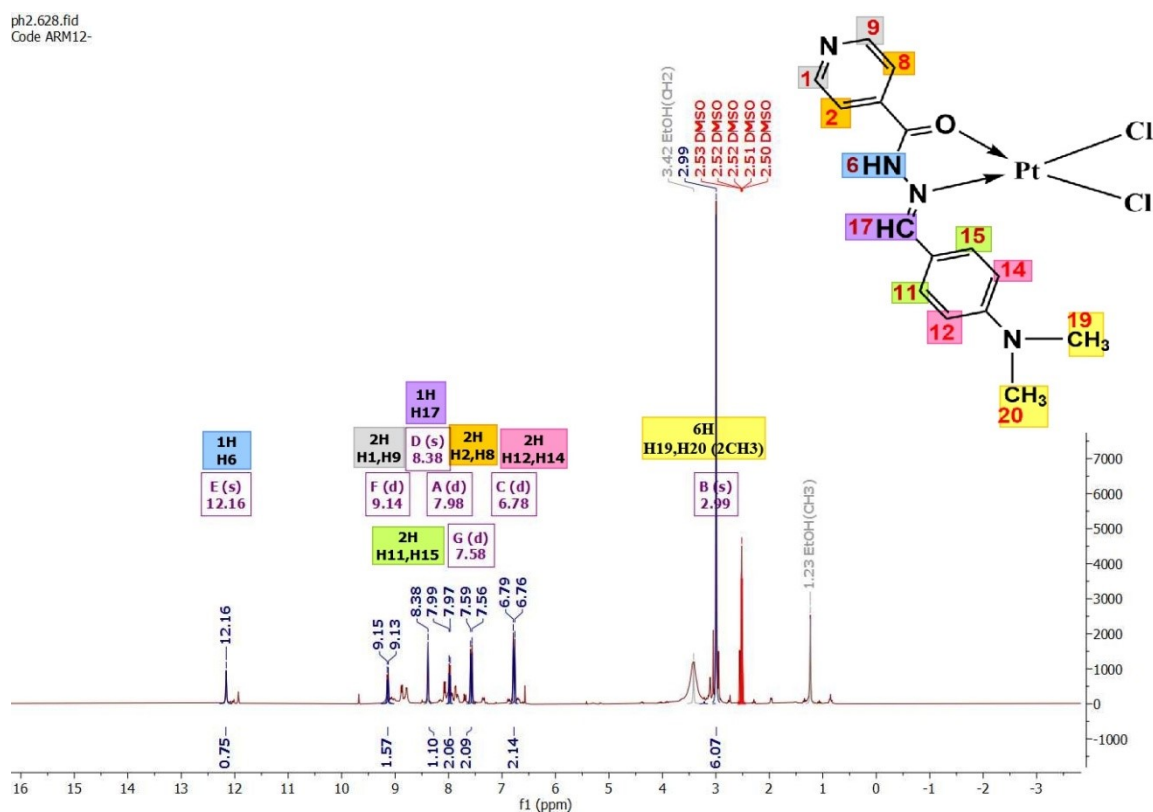

**Fig. SI 10.**  $^{13}\text{C}$  NMR spectrum of the **HL Ligand**

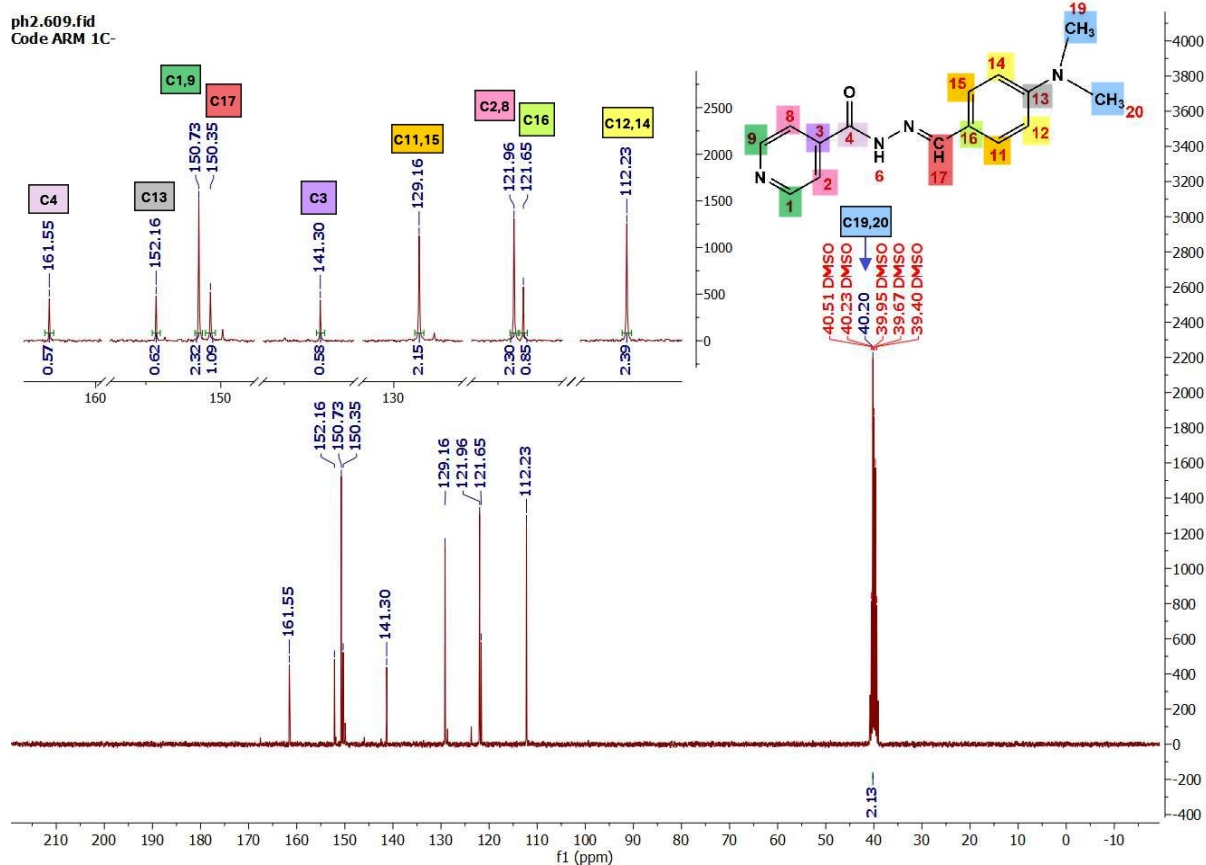



**Fig. SI 11.**  $^{13}\text{C}$  NMR spectrum of the **complex (1)**

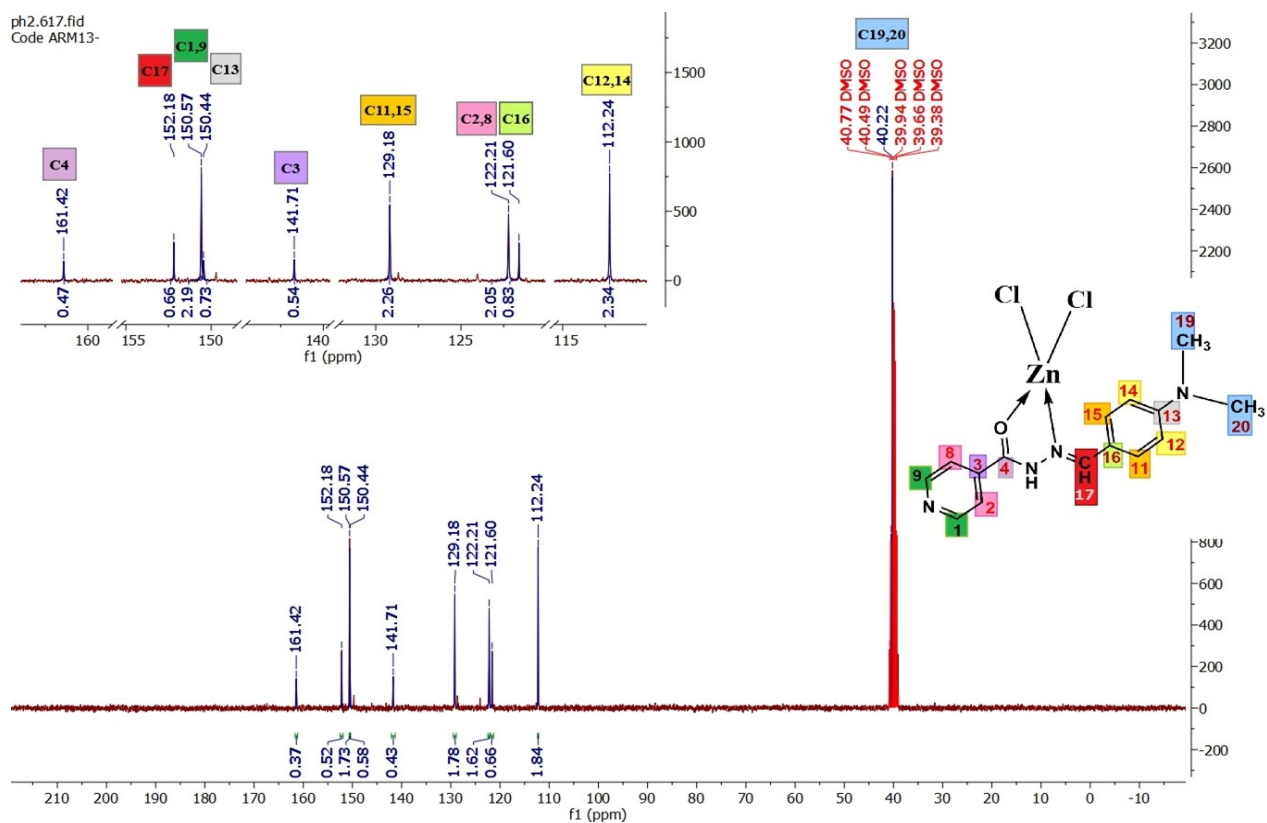

**Fig. SI 12.**  $^{13}\text{C}$  NMR spectrum of the **complex (2)**

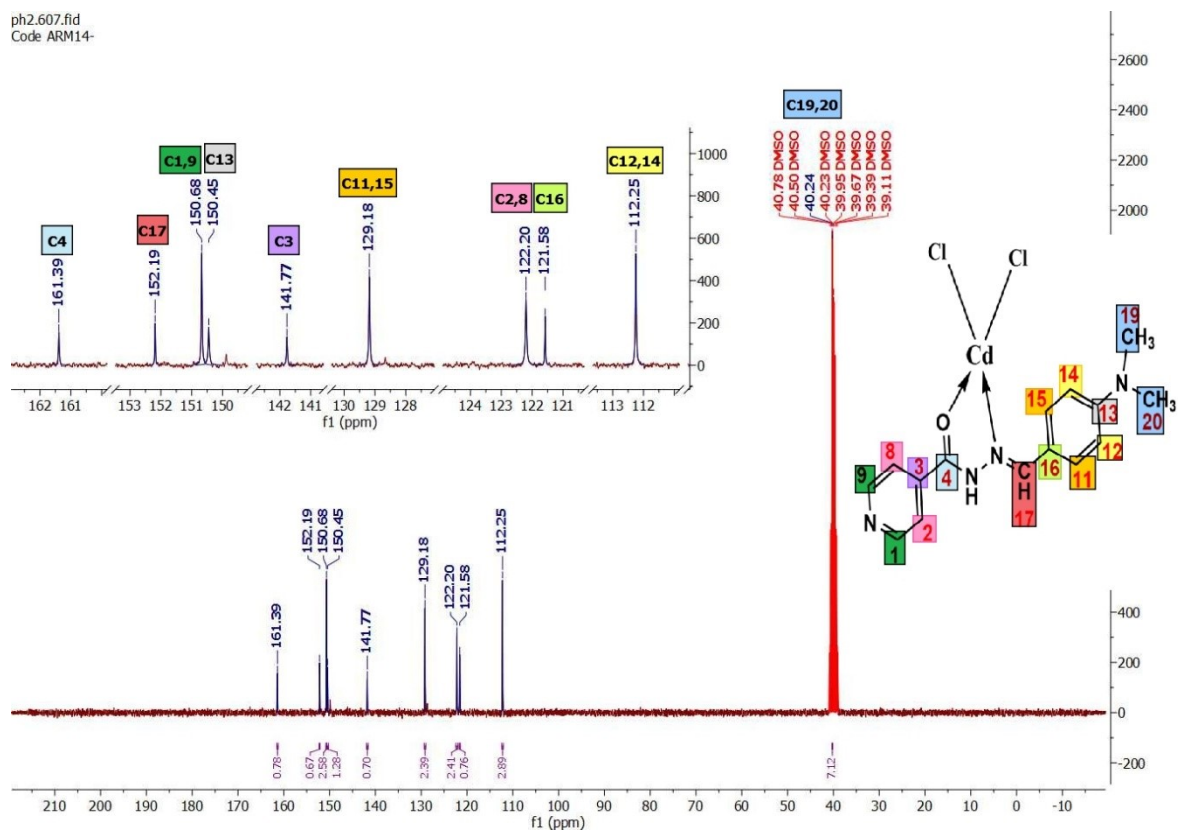

**Fig. SI 13.**  $^{13}\text{C}$  NMR spectrum of the **complex (3)**

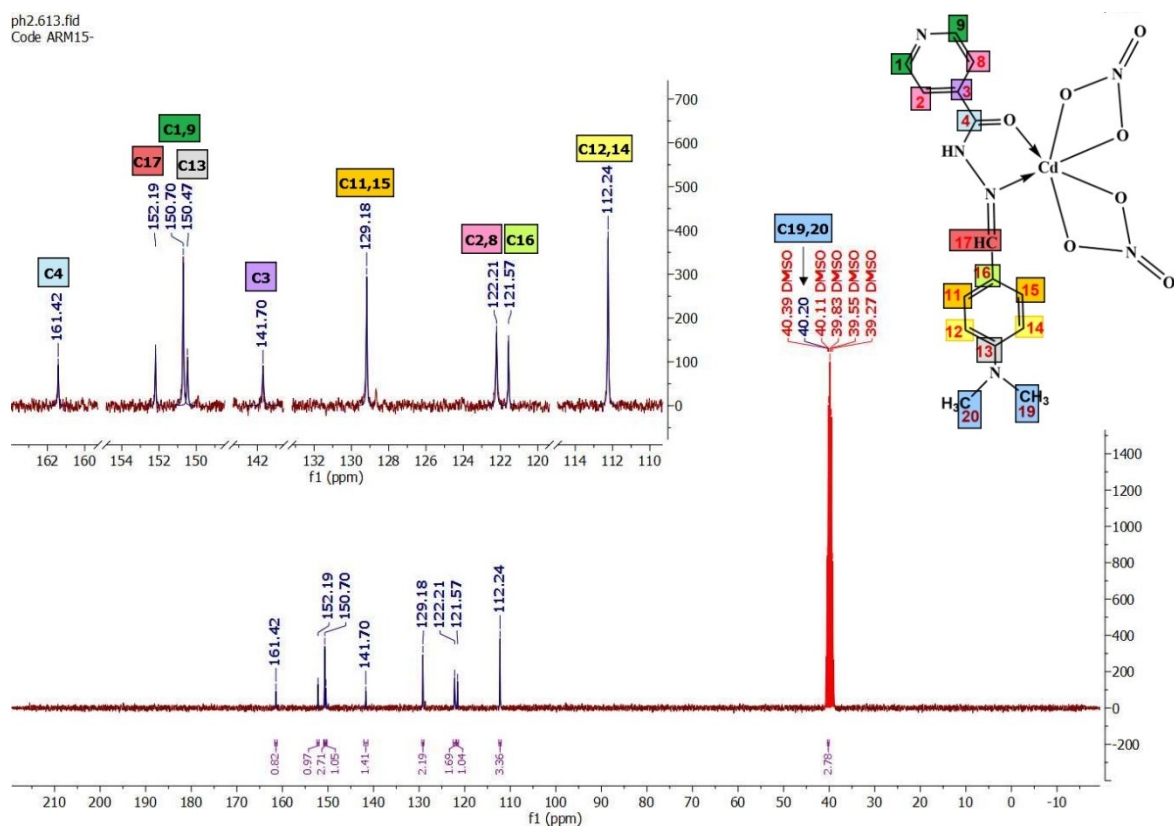

**Fig. SI 14.**  $^{13}\text{C}$  NMR spectrum of the **complex (4)**

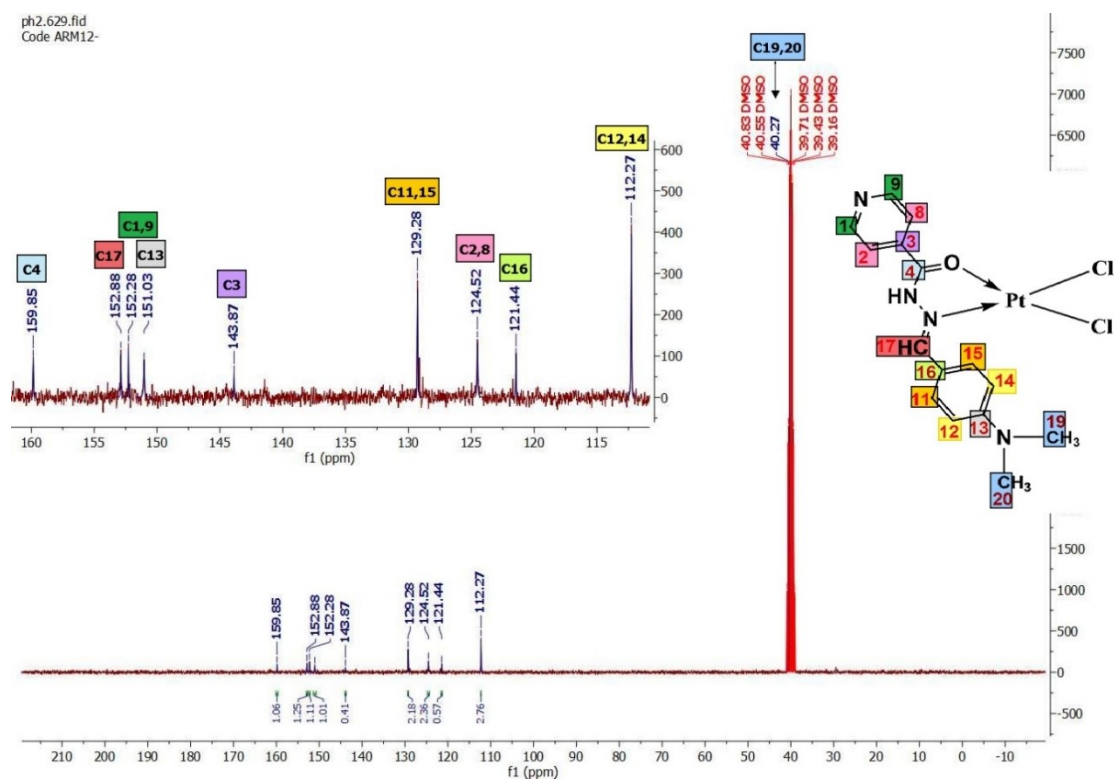



### **Exp. SI 1 Anti-bacterial activity**

Two pathogenic bacterial species (*Escherichia coli* and *Staphylococcus aureus*) were utilized to assess the antimicrobial activity of the synthesized complexes and free ligands. The antibacterial activity of the synthesized complexes was evaluated at concentrations of  $10^{-2}$ ,  $10^{-3}$ ,  $10^{-4}$ ,  $10^{-5}$ , and  $10^{-6}$  M of solutions, and the effects were compared to the streptomycin drug, and DMSO is a negative control. The agar disc diffusion method, as initially proposed by Bauer, was employed to evaluate the antibacterial characteristics of the complexes [Bauer, A. W., PERRY, D. M., & KIRBY, W. M. (1959). Single-disk antibiotic-sensitivity testing of staphylococci: An analysis of technique and results. *AMA archives of internal medicine*, 104(2), 208-216.]. All plates seeded at 37 °C were incubated for 24 hours, and the well was determined in the DIZ.
